# Supplementary material for: MFAP2 enhances cisplatin resistance in gastric cancer cells by regulating autophagy
Source: PeerJ journal article supplement (doi:10.7717/peerj.15441), 2023-06-07
Supplement: Raw_data.zip [file Raw_data.zip]

## Sheet: Figure 7
Fig 7A	AGS			AGS/CDDP
Cell viability (%)	99.65	98.02	104.33	181.35	190.23	175.62
Fig 7B	AGS			AGS/CDDP
cell apoptosis rate (%)	15.73	15.5	17.68	2.9	2.39	2.03
Fig 7C		AGS			AGS/CDDP
Relative gray value	cleaved PARP	2.52	3.68	3.05	0.98	0.75	1.35
	cleaved caspase-3	3.5	4.1	3.02	1.31	1.03	0.89
	cleaved caspase-9	2.98	3.36	2.72	0.89	1.35	1.05
Fig 7D		AGS			AGS/CDDP
Relative gray value	MFAP2	1.12	0.89	1.25	4.15	3.54	3.86

## Sheet: Figure 8
Fig 8A		AGS			AGS+OE-MFAP2			AGS/CDDP			AGS/CDDP+siMFAP2
Relative gray value	MFAP2	0.95	1.31	0.87	3.56	3.12	2.98	4.56	4.12	3.91	2.23	1.91	2.35
Fig 8B-1	CDDP (μg/ml)	AGS			AGS+OE-MFAP2
Cell viability (%)	0	98.15	103.25	102.87	100.12	96.52	102.88
	0.3	98.45	96.56	99.5	98.81	98.92	95.67
	0.6	90.12	92.59	95.33	96.62	94.71	92.94
	1.2	65.25	67.88	72.46	89.12	88.36	84.33
	2.4	53.72	55.65	59.21	77.54	78.78	72.36
	4.8	44.16	42.28	37.36	64.51	58.97	65.41
	9.6	32.4	33.56	37.62	52.43	58.43	50.22
	19.2	27.67	25.43	20.91	45.32	53.45	47.67
Fig 8B-2	CDDP (μg/ml)	AGS/CDDP			AGS/CDDP+siMFAP2
Cell viability (%)	0	104.45	95.4	100.15	98.24	104.25	99.55
	0.3	98.45	96.58	99.64	96.54	92.34	96.78
	0.6	96.34	97.48	95.53	92.32	94.22	88.67
	1.2	93.25	94.92	89.64	75.34	82.12	80.21
	2.4	91.15	87.34	85.96	64.34	68.53	72.34
	4.8	82.32	76.46	77.32	50.36	60.18	57.26
	9.6	66.23	68.62	60.34	37.35	48.45	43.22
	19.2	50.25	42.05	47.24	22.45	30.35	27.66
Fig 8C	AGS			AGS+OE-MFAP2			AGS/CDDP			AGS/CDDP+siMFAP2
cell apoptosis rate (%)	14.98	17.23	13.81	12.64	12.11	11.73	2.34	2.22	2.26	4.93	8.13	6.62
Fig 8D		AGS			AGS+OE-MFAP2			AGS/CDDP			AGS/CDDP+siMFAP2
Relative gray value	cleaved PARP	5.61	5.08	4.94	3.02	2.81	3.31	1.02	0.85	1.34	2.12	2.36	2.51
	cleaved caspase-3	4.35	5.03	4.82	2.95	3.12	2.46	0.95	0.84	1.25	2.58	2.03	1.52
	cleaved caspase-9	5.62	5.84	5.01	4.36	3.95	3.71	0.85	1.13	1.24	3.05	2.81	2.69

## Sheet: Figure 9
Fig 9		AGS			AGS+OE-MFAP2			AGS/CDDP			AGS/CDDP+siMFAP2
Relative gray value	p62	4.56	3.95	4.18	3.05	2.46	3.37	0.95	1.31	1.16	2.35	1.97	2.03
	Beclin-1	0.95	1.21	0.84	3.21	2.54	2.97	5.12	4.81	5.34	4.12	3.91	4.37
	ATG5	0.95	0.75	1.21	2.31	2.95	3.01	6.12	5.74	6.21	3.98	4.15	4.36
	LC3 II/I	1.02	1.19	0.87	2.51	1.98	3.29	6.02	5.78	5.29	3.94	3.54	4.58

## Sheet: Figure 10
Fig 10A		AGS			AGS/CDDP			AGS/CDDP+siMFAP2			AGS/CDDP+siMFAP2+Rap
Relative gray value	MFAP2	0.81	0.96	1.25	4.35	3.85	4.16	2.51	2.03	1.98	2.35	2.16	2.05
Fig 10B		AGS			AGS/CDDP			AGS/CDDP+siMFAP2			AGS/CDDP+siMFAP2+Rap
Relative gray value	p62	4.35	3.92	4.13	0.95	1.56	1.13	2.35	2.61	2.03	0.84	1.14	1.02
	Beclin-1	0.91	1.31	1.05	5.02	4.81	5.31	4.02	3.87	4.31	6.23	6.04	6.51
	ATG5	0.85	1.31	1.12	4.56	4.02	5.13	3.51	3.82	3.29	5.98	5.42	6.03
	LC3 II/I	0.91	1.26	1.07	5.23	4.81	5.47	3.84	3.61	4.31	6.21	6.51	5.91
Fig 10C	CDDP (μg/ml)	AGS			AGS/CDDP			AGS/CDDP+siMFAP2			AGS/CDDP+siMFAP2+Rap
Cell viability (%)	0	97.23	103.67	99.1	104.45	95.4	100.15	98.24	104.25	99.55	103.78	95.45	100.77
	0.3	95.23	92.78	96.33	98.45	96.58	99.64	96.54	92.34	96.78	97.89	95.43	98.37
	0.6	85.45	89.89	86.77	96.34	97.48	95.53	92.32	94.22	88.67	90.78	92.42	88.4
	1.2	72.34	76.58	70.33	93.25	94.92	89.64	75.34	82.12	80.21	85.25	93.27	89.78
	2.4	52.72	55.65	60.21	91.15	87.34	85.96	64.34	68.53	72.34	79.22	86.47	85.9
	4.8	44.15	42.36	37.46	82.32	76.46	77.32	50.36	60.18	57.26	70.33	65.38	76.34
	9.6	30.23	32.35	36.64	66.23	68.62	60.34	37.35	48.45	43.22	51.23	48.37	57.84
	19.2	26.63	23.43	19.91	50.25	42.05	47.24	22.45	30.35	27.66	40.36	32.05	41.65
Fig 10D		AGS			AGS/CDDP			AGS/CDDP+siMFAP2			AGS/CDDP+siMFAP2+Rap
cell apoptosis rate (%)		19.12	15.57	15.2	2.36	2.07	2.33	10.17	13.11	10.77	6.54	8.65	6.62
Fig 10E		AGS			AGS/CDDP			AGS/CDDP+siMFAP2			AGS/CDDP+siMFAP2+Rap
Relative gray value	cleaved PARP	5.32	4.98	5.16	0.94	1.12	1.21	3.26	3.54	3.02	2.12	1.98	2.51
	cleaved caspase-3	5.21	5.56	5.02	0.84	0.99	1.16	3.25	3.41	3.02	2.28	2.01	2.64
	cleaved caspase-9	4.81	5.03	4.61	0.94	0.91	1.27	2.61	2.31	3.09	1.81	1.62	2.03
